# Supplementary material for: Phenolic Compounds and Expression of 4CL Genes in Silver Birch Clones and Pt4CL1a Lines
Source: PubMed Central journal article supplement (PMC4263613; doi:10.1371/journal.pone.0114434), 2014-12-11
Supplement: pone.0114434.s001.pdf [file pone.0114434.s001.pdf]

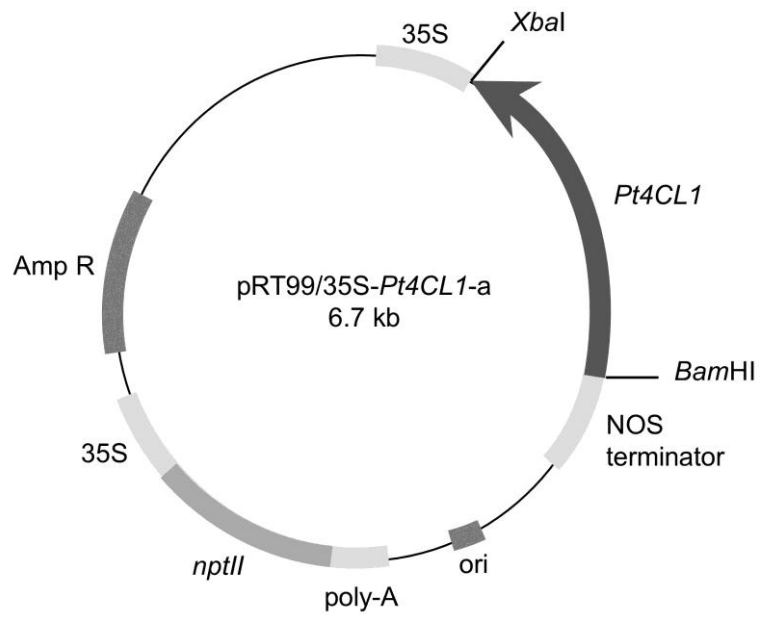

**Figure S1. A schematic presentation of the pRT99/35S-Pt4CL1-a plasmid vector used in the biolistic transformation of silver birch clones A, E5382 and E5396.**

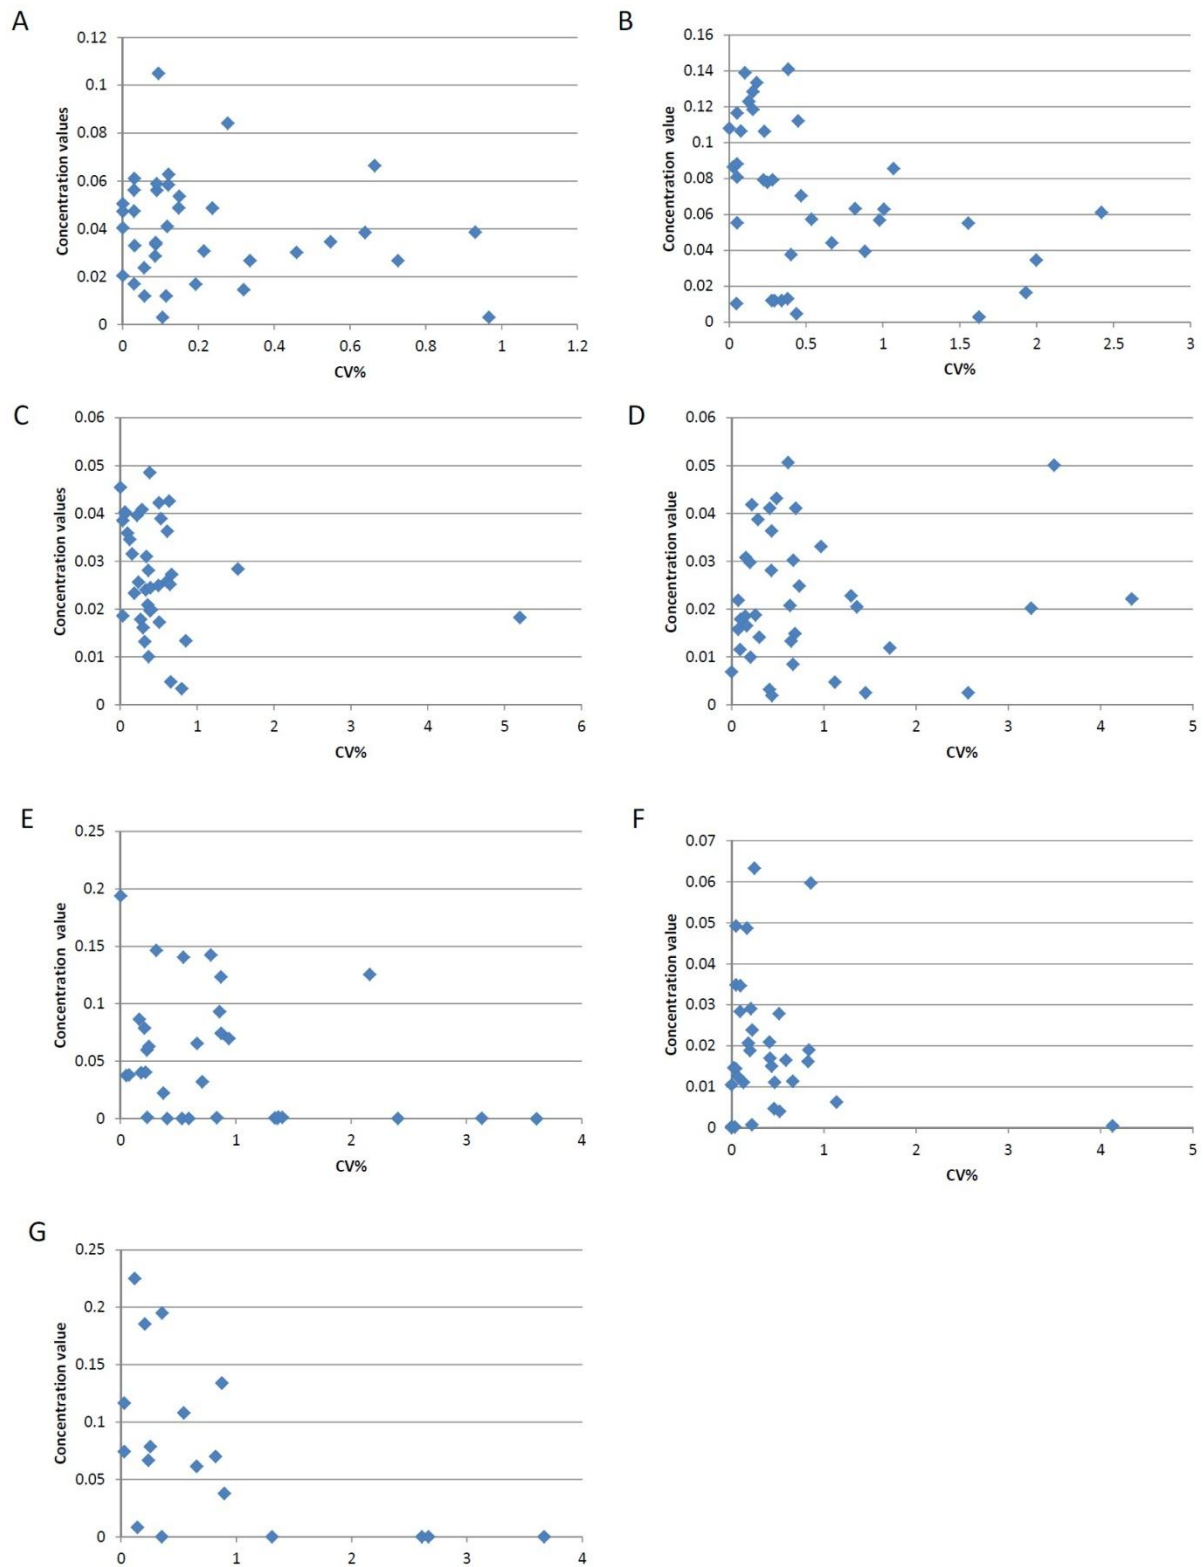

**Figure S2. The scatterplots presenting CV% and concentration values of stem samples.** The CV% ( $SD_{Cq}/mean_{Cq}$ ) values were calculated from two technical replicates of each utilized primer pair and the concentration values were generated with Abs Quant/2nd Derivative Max for All Samples Analysis of Lightcycler 480 Software release 1.5.0 SP3. A, *Atub*; B, *PP2A*; C, *Bp4CL1*; D, *Bp4CL2*; E, *Bp4CL3*; F, *Bp4CL4*; G, *Pt4CL1*.

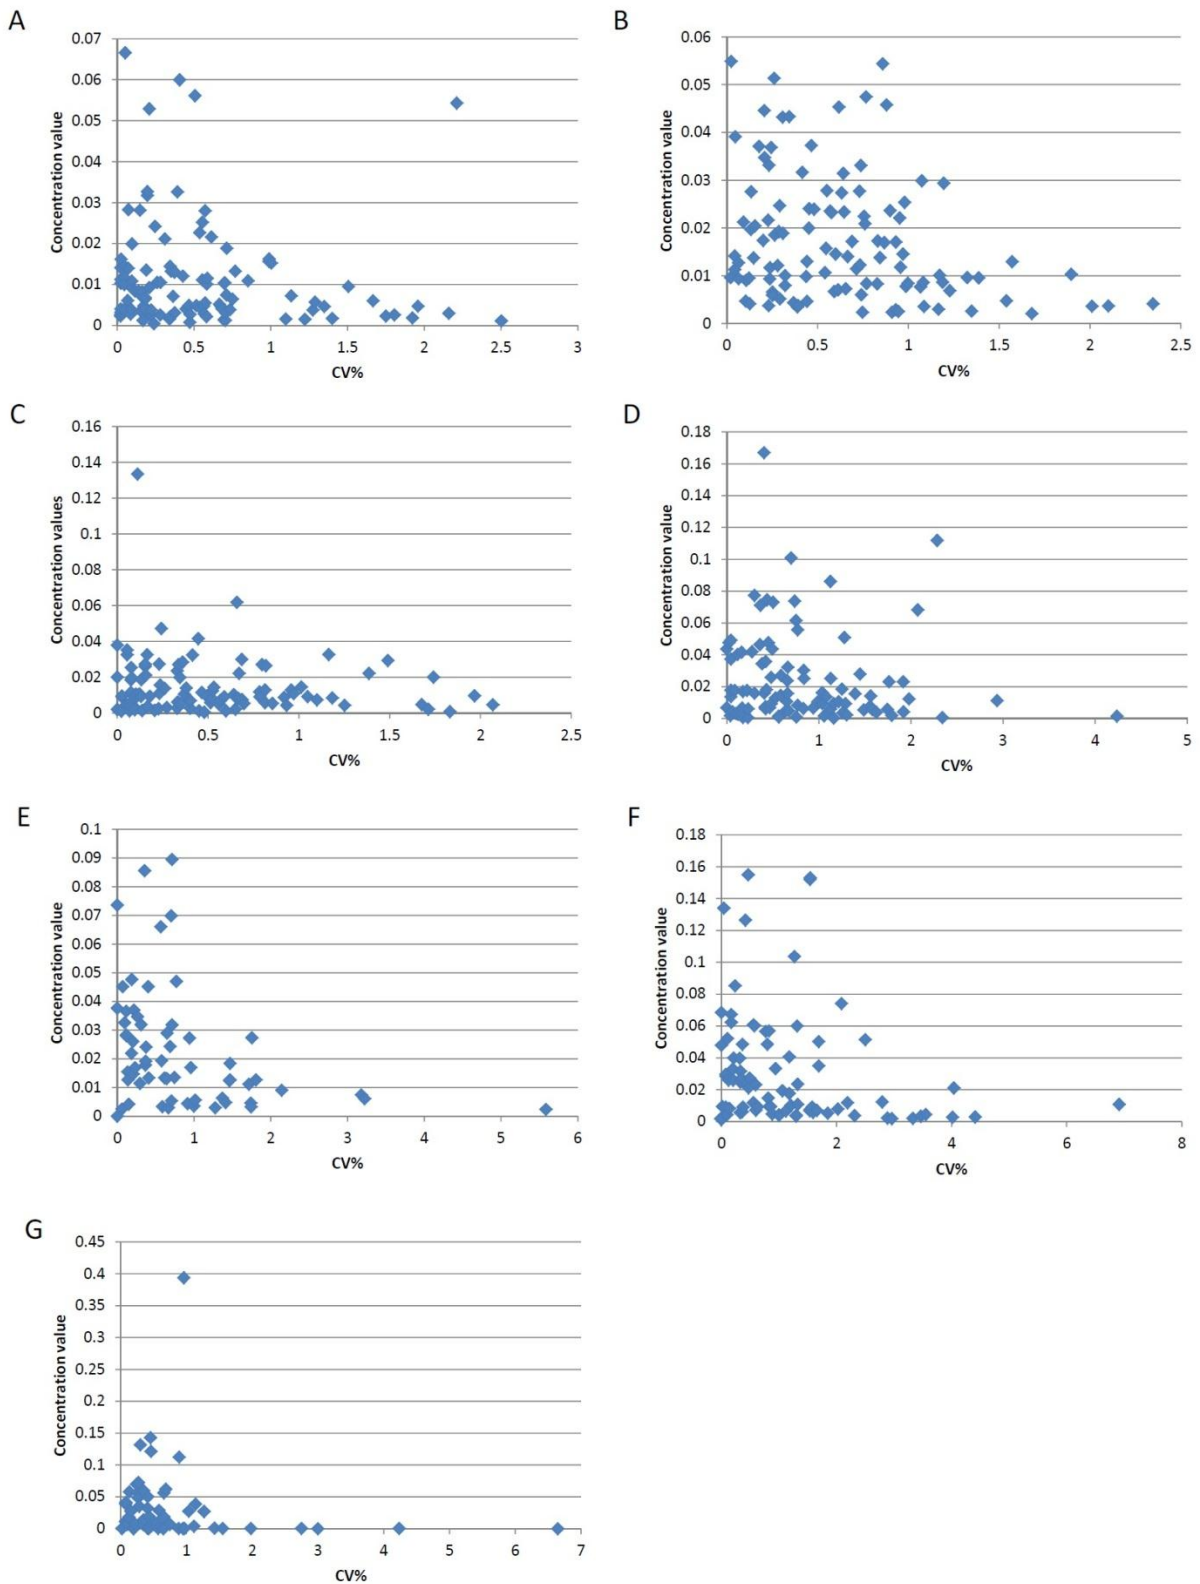

**Figure S3. The scatterplots presenting CV% and concentration values of leaf samples.** The CV% ( $SD_{Cq}/mean_{Cq}$ ) values were calculated from two technical replicates of each utilized primer pair and the concentration values were generated with Abs Quant/2nd Derivative Max for All Samples Analysis of Lightcycler 480 Software release 1.5.0 SP3. A, *Atub*; B, *PP2A*; C, *Bp4CL1*; D, *Bp4CL2*; E, *Bp4CL3*; F, *Bp4CL4*; G, *Pt4CL1*.

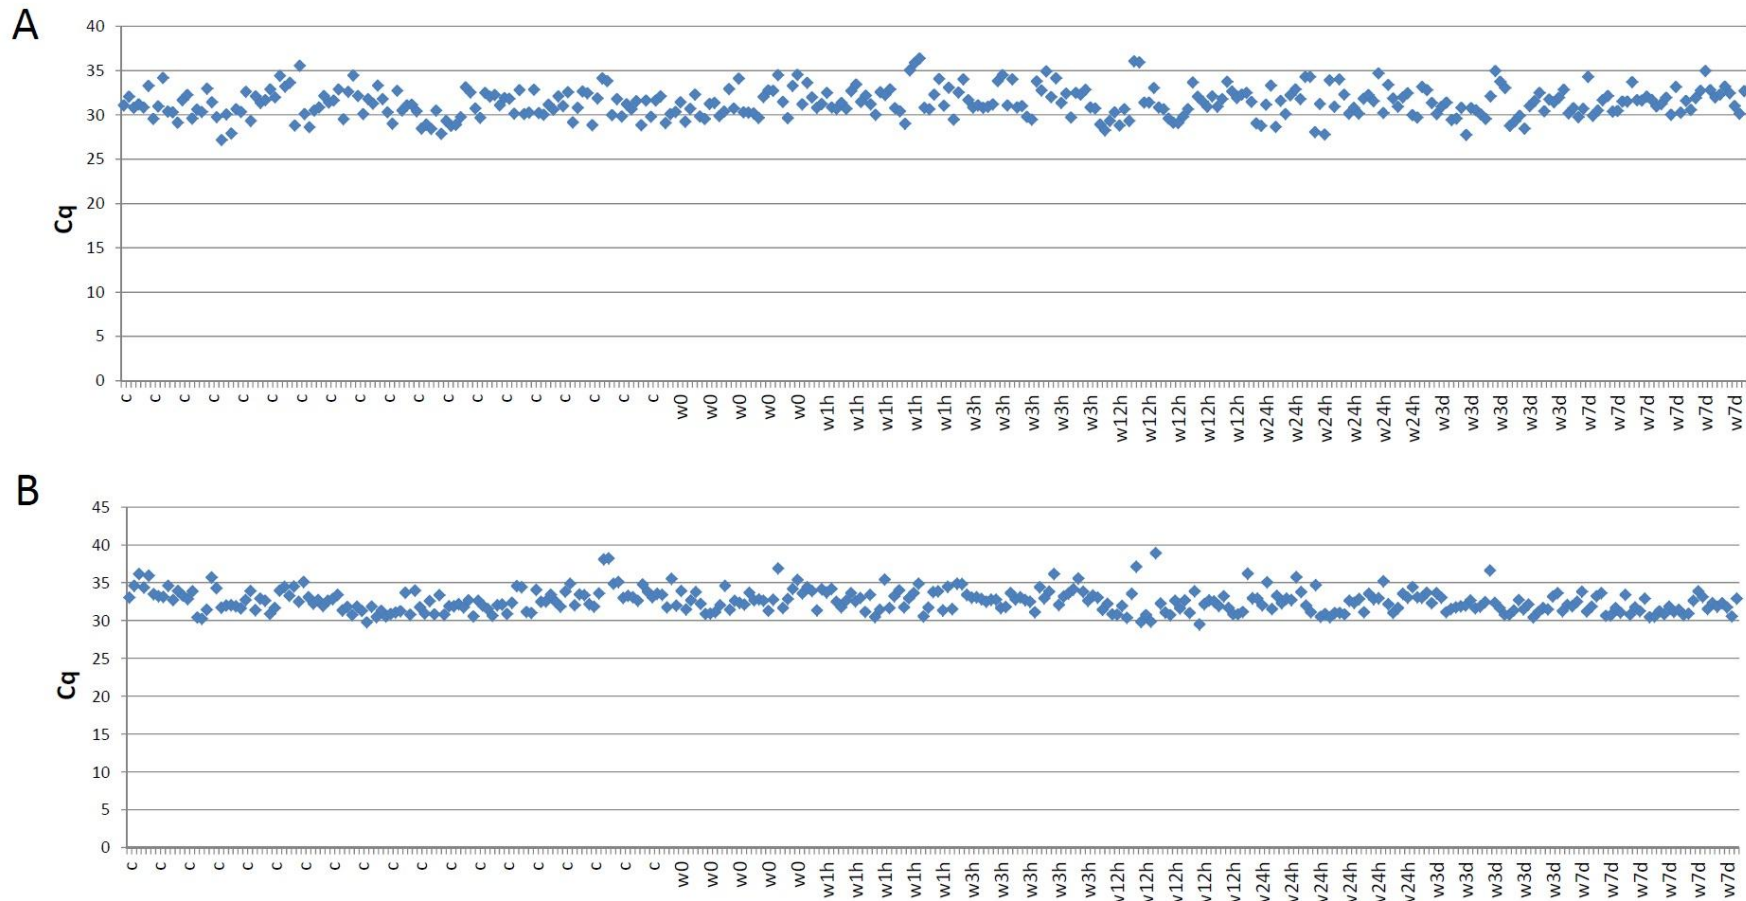

**Figure S4. The Cq values of *Atub* and *PP2A* in undamaged and wounded leaves.** The Cq values represent crossing point values generated with Abs Quant/2nd Derivative Max for All Samples Analysis of Lightcycler 480 Software release 1.5.0 SP3 of *Atub* (A) and *PP2A* (B) in non-treated leaves (c) and leaves collected immediately after mechanical wounding (w0) and 1 (w1h), 3 (w3h), 12 (w12h), 24 (w24h), 72 (w3d) and 168 (w7d) hours after the wounding treatment.

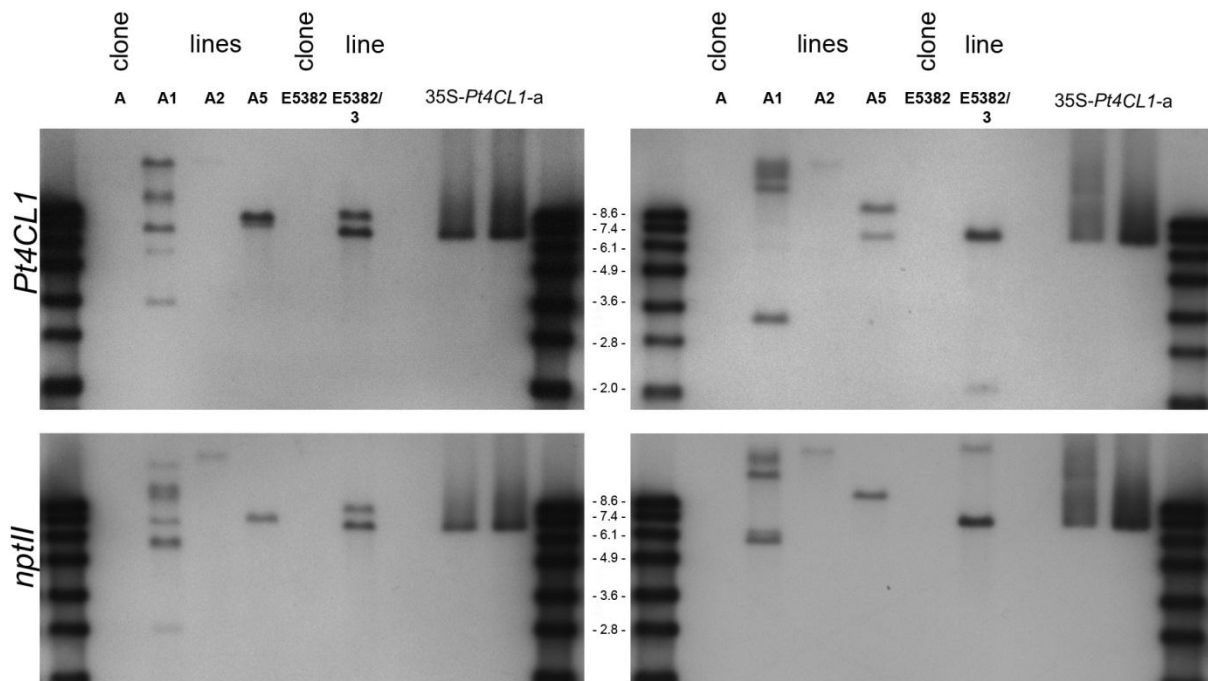

**Figure S5. Southern blot analysis of regenerated silver birch lines.** Lines A1, A2, A5 and E5382/3 were transformed with pRT99/35S-*Pt4CL1*-a plasmid vector and probed for the presence of the 35S-*Pt4CL1* and *nptII*. A genomic DNA sample of 15  $\mu$ g digested with *Bam*HI (figures on the left) or *Xba*I (figures on the right) was loaded to each lane.

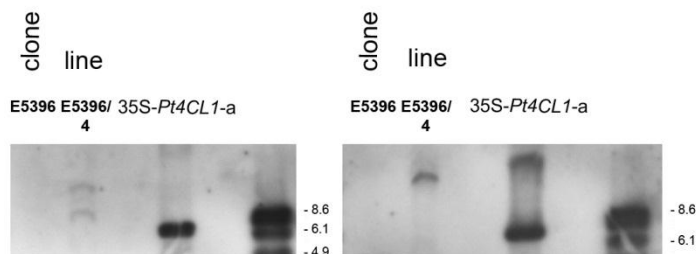

**Figure S6. Southern blot analysis of regenerated silver birch line E5396/4.** Line was transformed with pRT99/35S-*Pt4CL1*-a plasmid vector and probed for the presence of the *nptII*. A genomic DNA sample of 15  $\mu$ g digested with *Bam*HI (figures on the left) or *Xba*I (figures on the right) was loaded to each lane.

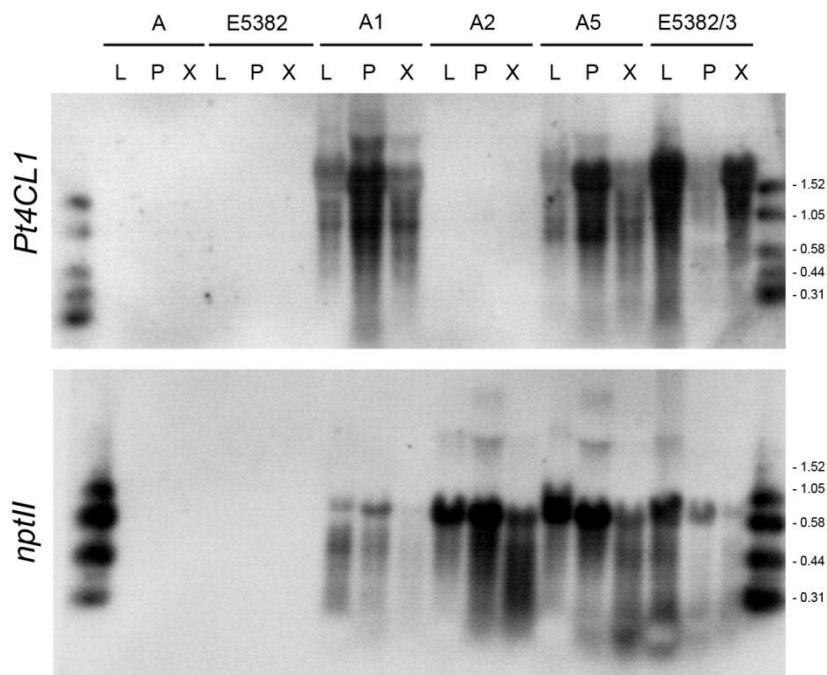

**Figure S7. Northern blot analysis of transgenic silver birch lines.** RNA samples of 15  $\mu$ g were isolated from the leaf (L), phloem (P) and xylem (X) of clones A and E5382 and lines A1, A2, A5 and E5382/3. The probes were 1.1 and 0.8 kb for *Pt4CL1* and *nptII*, respectively.

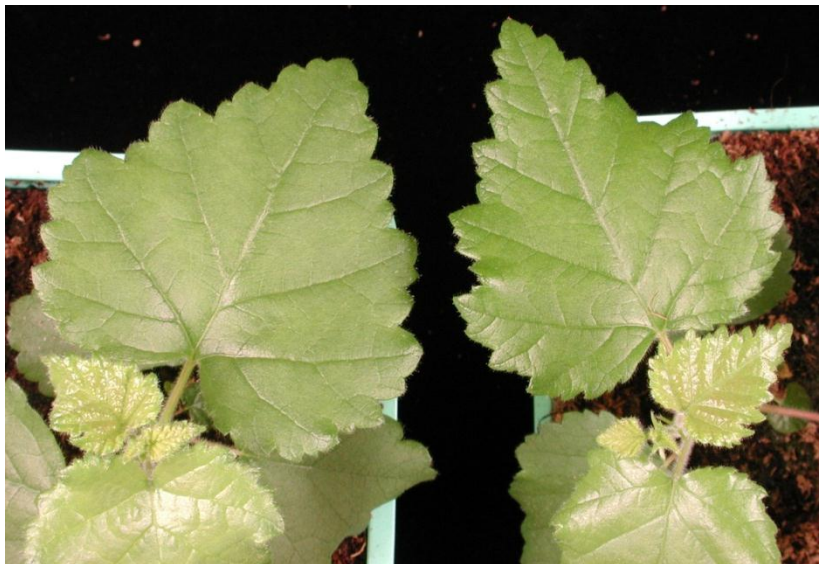

**Figure S8. The leaf morphology of *Pt4CL1a* line E5382/3.** During the first growing season in the greenhouse, the leaf margins of *Pt4CL1a* line E5382/3 (on the left) differed in from clone E5382 (on the right).

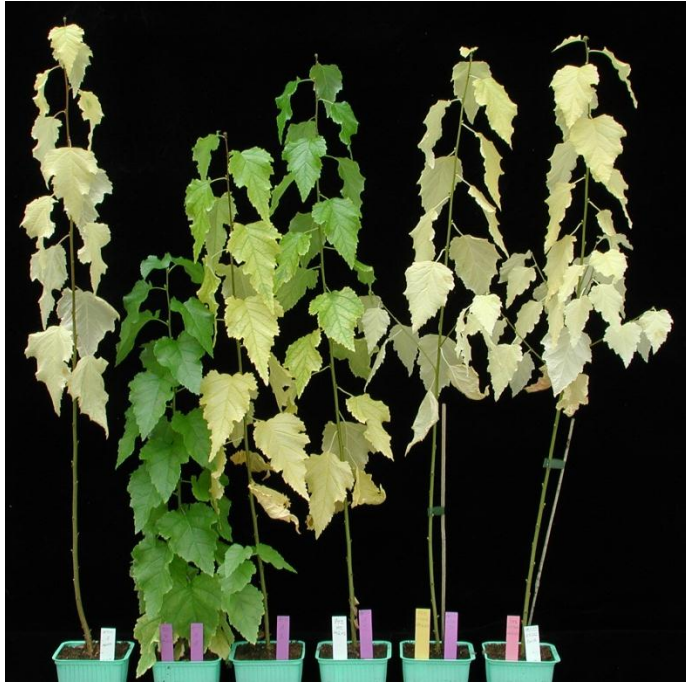

**Figure S9. The autumn leaf senescence of silver birch clones and lines.** The clone A, line A2, line A5, line E5382/3, and clone E5382 (from left to right) at the end of first growing season at the greenhouse of Finnish Forest Research Institute Punkaharju Unit (photographed on the 6<sup>th</sup> of October).

|            |     |    |                                                                |
|------------|-----|----|----------------------------------------------------------------|
| Bp1 4CL1   | 1   | -- | MAIQAKEQEFIFRSKLPDIYIPKHLPIHSYCFENISKVGSRPCLINGLTGKVVYTYADV    |
| Bp4CL1     | 1   | -- | MAIQAKEQEFIFRSKLPDIYIPKHLPIHSYCFENISKVGSRPCLINGLTGKVVYTYADV    |
| B1 4CL     | 1   | -- | MAIQAKEQEFIFRSKLPDIYIPKHLPIHSYCFENISKVGSRPCLINGLTGKVVYTYADV    |
| Pt 4CL1    | 1   | -- | MNPQEFIFRSKLPDIYIPKHLPLHSYVLENLSKHSSKPCLINGANGDVYTYADV         |
| Poptr 4CL3 | 1   | -  | MDAIMNSQEFIFRSKLPDIYIPKHLPLHSYVLENLSKYSSKPCLINGANGDVCTYADV     |
| Poptr 4CL5 | 1   | -  | MDITIKQKEEFIFRSKLPDIYIPKGLPLHSYVFNFSKYPSKPCLINGANGDVYTYADV     |
| Me4CL2     | 1   |    | METQLINQQGEFIFRSKLPDIYIPKHLPLHSYIFENISSHSSRPCLINGATGDVYTYAEV   |
| Me4CL3     | 1   |    | METQVLKQGEFIFRSKLPDIYIPKHLPLHSYIFENISSHSSKPCLINGVTGNVYTYSEV    |
| Gm4CL2     | 1   | -- | MADDGSRRELFIFRSKLPDIYIPKHMPLHSYCFENLRECGSRPCLINAPTDGVVYSYHEV   |
| Gm4CL6     | 1   | -- | MAVVERRRELFIFRSKLPDIYIPKHLPLHTYCFENLPEYGARPCLINAPTDGVVYSYEEV   |
|            |     |    |                                                                |
| Bp1 4CL1   | 59  |    | ELTARKVASGLSKLGIQKGDVVMLLPNSPPEFAFVFLGASYLGAMTTAANPFCTAGEVSK   |
| Bp4CL1     | 59  |    | ELTARKVASGLSKLGIQKGDVVMLLPNSPPEFAFVFLGASYLGAMTTAANPFCTAGEVSK   |
| B1 4CL     | 59  |    | ELTARKVASGLSKLGIQKGDVVMLLPNSPPEFAFVFLGASYLGAMTTAANPFCTAGEVSK   |
| Pt 4CL1    | 55  |    | ELTARRVASGLNKLGIQQGDVIMLFLPSSPEFVLAFLGASHRGAMITAAANPFSTPAELAK  |
| Poptr 4CL3 | 60  |    | ELTARRVASGLNKLGIQQGDVIMLFLPSSPEFVLAFLGASHRGAMITAAANPFSTPAELAK  |
| Poptr 4CL5 | 60  |    | ELTARRVASGLNKLGIQQGDVIMLFLPSSPEFVLAFLGASHRGAMITAAANPFSTPAELAK  |
| Me4CL2     | 61  |    | ELTARRVASGLNKLGIQQGDVIMLFLHNSPQFVLSFLGASFRGAMITAAANPFSTPAELAK  |
| Me4CL3     | 61  |    | ELTARRVASGLNKLGIQQGEVIMLFLHNSPEFVLSFLGASFRGAMITAAANPFSTPAELAK  |
| Gm4CL2     | 59  |    | DSTARVKVARGLKKEGVEQGOVIMLFLPNCPEFVFSFLGASHRGAMITAAANPFSTPAELAK |
| Gm4CL6     | 59  |    | ESTARKVARGLKKEGVEQGOVIMLFLPNCPEFVFSFLGASHRGAMITAAANPFSTPAELAK  |
|            |     |    |                                                                |
| Bp1 4CL1   | 119 |    | QAKSANAKIVVTOACYYDRVKDYTNENGVKIIICIDSPPE-----DCLHFSELTKADEND-  |
| Bp4CL1     | 119 |    | QAKSANAKIVVTOACYYDRVKDYTNENGVKIIICIDSPPE-----DCLHFSELTKADEND-  |
| B1 4CL     | 119 |    | QAKSANAKIVVTOACYYDRVKDYTNENGVKIIICIDSPPE-----DCLHFSELTKADEND-  |
| Pt 4CL1    | 115 |    | HAKASRAKLLITQACYEKKVDFARESDVKVMCVDSAPD-----GASLFRHITKADENE-    |
| Poptr 4CL3 | 120 |    | HAKASRAKLLITQACYEKKVDFARESDVKVMCVDSAPD-----GCLHFSELTKADENE-    |
| Poptr 4CL5 | 120 |    | QAKSNAKLLITQACYYDKVDAQQNDVKKVMCVDSAPD-----VCLHFSELTKADEND-     |
| Me4CL2     | 121 |    | QAKSNTKLLITQAAAYAEKVKDLARDHGIKVLICIDSPD-----GCLHFSSELSEADERD-  |
| Me4CL3     | 121 |    | QAKSNTKLLITQAAAYAEKVKDLARDYGIKILICIDSPD-----GCLHFSSELSEADERD-  |
| Gm4CL2     | 119 |    | QAHASNAKLLITQASYYDKVKDLR---DIKLVFVDSCPPHTEEKQHLHFSHLCEDNGDAD   |
| Gm4CL6     | 119 |    | QAHASNAKLLITQASYYDKVKDLR---HIKLVFVDSCPP-----QHLHFSQLCEDNG---   |
|            |     |    |                                                                |
| Bp1 4CL1   | 173 | -  | VAEVDISPDDVVALPYSSGTTGLPKGVMITHKGLVTSVAQQVDGDNPNLYYHSEVDILC    |
| Bp4CL1     | 173 | -  | VAEVDISPDDVVALPYSSGTTGLPKGVMITHKGLVTSVAQQVDGDNPNLYYHSEVDILC    |
| B1 4CL     | 173 | -  | VAEVDISPDDVVALPYSSGTTGLPKGVMITHKGLVTSVAQQVDGDNPNLYYHSEVDILC    |
| Pt 4CL1    | 169 | -  | VPOVDISPDDVVALPYSSGTTGLPKGVMITHKGLITVAQQVDGDNPNLYYHSEVDILC     |
| Poptr 4CL3 | 174 | -  | VPOVDISPDDVVALPYSSGTTGLPKGVMITHKGLITVAQQVDGDNPNLYYHSEVDILC     |
| Poptr 4CL5 | 174 | -  | MPQVDISPDDVVALPYSSGTTGLPKGVMITHKGLITVAQQVDGDNPNLYYHSEVDILC     |
| Me4CL2     | 175 | -  | MPDVNISSEDDVVALPYSSGTTGLPKGVMITHKGLVTSVAQQVDGDNPNLYYHSEVDILC   |
| Me4CL3     | 175 | -  | MPDVIDISPDDVVALPYSSGTTGLPKGVMITHKGLVTSVAQQVDGDNPNLYYHSDVDILC   |
| Gm4CL2     | 176 | -  | VDVDVIDISPDDVVALPYSSGTTGLPKGVMITHKGLVTSVAQQVDGDNPNLYYHCHDTILC  |
| Gm4CL6     | 168 | -  | DADVIDISPDDVVALPYSSGTTGLPKGVMITHKGLVTSVAQQVDGDNPNLYYHCHDTILC   |
|            |     |    |                                                                |
| Bp1 4CL1   | 232 |    | VLPLFHIYSLNSVFLCGLRAGASLILPKFIEVSLQLIKHKVTVMPIVPPIVLAI TKF     |
| Bp4CL1     | 232 |    | VLPLFHIYSLNSVFLCGLRAGASLILPKFIEVSLQLIKHKVTVMPIVPPIVLAI TKF     |
| B1 4CL     | 232 |    | VLPLFHIYSLNSVFLCGLRAGASLILPKFIEVSLQLIKHKVTVMPIVPPIVLAI TKF     |
| Pt 4CL1    | 228 |    | VLPMFHIYALNSIML CGLRVGASLIMPKFIEVSLGLIEKYKVSIPVPPVMMVAI AKS    |
| Poptr 4CL3 | 233 |    | VLPMFHIYALNSIML CGLRVGASLIMPKFIDITLLGLIEKYKVSIPVPPVMMVAI AKS   |
| Poptr 4CL5 | 233 |    | VLPMFHIYALNSIML CGLRVGAALIMPKFIEVSLGLIEKYKVSIPVPPVMMVAI AKS    |
| Me4CL2     | 234 |    | VLPMFHIYALNSIML CGLRVGAALIMPKFIDIGALLQLIKYKIVTAVPIVPPIVLAI AKS |
| Me4CL3     | 234 |    | VLPMFHIYALNSIML CGLRVGAALIMPKFIEVSLGLIKYKIVTAVPIVPPIVLAI AKS   |
| Gm4CL2     | 236 |    | VLPLFHIYSLNSVLLCGLRAKATILMPKFIDINSLLALIKHKVTVIAPVPPIVLAI SKS   |
| Gm4CL6     | 227 |    | VLPLFHIYSLNSVLLCGLRAKATILMPKFIDINSLLALIKHKVTVIAPVPPIVLAI SKS   |
|            |     |    |                                                                |
| Bp1 4CL1   | 292 |    | PDLDKYDLSSVKMLKSGGAPLGKEIEETVKKAKFPNALFGQGYGMEAGPVLAMCLAFAKE   |
| Bp4CL1     | 292 |    | PDLDKYDLSSVKMLKSGGAPLGKEIEETVKKAKFPNALFGQGYGMEAGPVLAMCLAFAKE   |
| B1 4CL     | 292 |    | PDLDKYDLSSVKMLKSGGAPLGKEIEETVKKAKFPNALFGQGYGMEAGPVLAMCLAFAKE   |
| Pt 4CL1    | 288 |    | PDLDKHDLSSLRMLKSGGAPLGKELEDTVRAKFPQARLFGQGYGMEAGPVLAMCLAFAKE   |
| Poptr 4CL3 | 293 |    | PDLDKHDLSSLRMLKSGGAPLGKELEDTVRAKFPQARLFGQGYGMEAGPVLAMCLAFAKE   |
| Poptr 4CL5 | 293 |    | PDLDKHDLSSLRMLKSGGAPLGKELEDTVRAKFPQARLFGQGYGMEAGPVLAMCLAFAKE   |
| Me4CL2     | 294 |    | PDLTKYDLSSLRMLKSGAAPLGKELEDTVRAKFPQATLFGQGYGMEAGPVLAMCLAFAKE   |
| Me4CL3     | 294 |    | PDLTKYDLSSLRMLKSGAAPLGKELEDTVRAKFPQATLFGQGYGMEAGPVLAMCLAFAKE   |
| Gm4CL2     | 296 |    | PDLHKYDLSSLRVFKSGGAPLGKELEDLRAKFPNAKLFGQGYGMEAGPVLAMSLAFAKE    |
| Gm4CL6     | 287 |    | PDLHNYDLSSLRVFKSGGAPLGKELEDLRAKFPNAKLFGQGYGMEAGPVLAMSLAFARE    |

**Figure S10. Alignment of predicted amino acid sequence of silver birch (*Betula pendula*) putative 4-coumarate:CoA ligase (Bp4CL1, KM099195). Bp4CL1 aligned with the predicted amino acid sequences of *Betula luminifera* (Bp14CL1, AY792353), *Betula platyphylla* (B14CL, FJ410448), *Glycine max* (Gm4CL2, Glyma13g44950; Gm4CL6, Glyma15g00390), *Manihot esculenta* (Mes4CL2, cassava4.1\_005014m; Mes4CL3, cassava4.1\_005006m), *Populus tremuloides* (Pt4CL1, AF041049), and *Populus trichocarpa* (Poptr4CL3, grail3.0100002702 LG I; Poptr4CL5, fgenesh4\_pg.C\_LG\_III001773 LG III).**



|             |     |                                                                  |
|-------------|-----|------------------------------------------------------------------|
| Pt 4CL2     | 1   | MMSVATVE-----PPKPELSPPQONAPSSHET-----DHI FRSKLP                  |
| Popt r 4CL4 | 1   | MMSVATVE-----PPKPELSPPQONAPSSHET-----DHI FRSKLP                  |
| Mes 4CL1    | 1   | MSIASLELE-----PSKPEVSPPHNSDA-----HI FRSKLP                       |
| Bp4CL2      | 1   | MISVANSST-----PONQEFSPKIPGPTQPSET-----ACVFKSKLP                  |
| Ri 4CL3     | 1   | MISASNNNNNSVVVETPTKPEISPNISDVISSTSQIQPEKQQPPTTTTHHVFKSKLP        |
| At 4CL3     | 1   | MITAAALHPQ-----IHKPTDTSVVSDDVLPSPPT-----PRI FRSKLP               |
| Gra 4CL3    | 1   | MSEAAATSFETQHSSTESCVPKTTTSSDVSSSPQT-----HI FRSKLP                |
|             |     |                                                                  |
| Pt 4CL2     | 38  | DIIT-LSNDLPLHAYCFENLSDFSDRPCLISGSTGKTYSFAETHLSRKVAAGLSNLGK       |
| Popt r 4CL4 | 38  | DIIT-LSNHLPLHAYCFENLSDFSDRPCLISGSTGKTYSFAETHLSRKVAAGLSNLGK       |
| Mes 4CL1    | 33  | DIPI-LSNHLPLHAYCFENLSDFAADRPCLISGSTGKTYSFAETHLSOKCAAGLSNLGK      |
| Bp4CL2      | 42  | EIP-LSDHLPLHTYCFEFLAEFSDRPCLISGSTGKTYSFAETHLSOKIAAGLSNLGK        |
| Ri 4CL3     | 61  | DLPL-LSNHLPLHTYCFENLSDFSERPCLISGSTGKSYTFSETRLSOKTGVGLSKLGIHK     |
| At 4CL3     | 41  | DIID-LSNHLPLHTYCFEKLSSVSDKRPCLISGSTGKSYTYGETHLCRRFVASGLYKLGIRK   |
| Gra 4CL3    | 47  | DIPI-LPNLPLHKYCFCLKPEIADRPCLISAGS--RKYTYGETHVTSSRRVAAGMSKLGIOK   |
|             |     |                                                                  |
| Pt 4CL2     | 97  | GDVIMTLLQNCPEFVFSFNGASMGAVITANPFYTSQSEIFKQFSASRAKLIITOSQYVN      |
| Popt r 4CL4 | 97  | GDVIMTLLQNCPEFVFSFNGASMGAVITANPFYTSQSEIFKQFSASRAKLIITOSQYVN      |
| Mes 4CL1    | 92  | GDVIMTLLQNCPEFVFSFNGASMGAVITANPFYTSNEIFKQFSASRAKLIITOSQYVD       |
| Bp4CL2      | 101 | GDVIMTLLQNCPEFVFSFNGASMGAVITANPFYTSAEVFKQLNSSKAKLIITOSQYVD       |
| Ri 4CL3     | 121 | GDVIMTLLQNCPEFVFSFNGASMGAVITANPFYTSASEIFKQLEASNAKLIITOSQYVD      |
| At 4CL3     | 100 | GDVIMTLLQNCPEFVFSFNGASMGAVITANPFYTSQELYKQLKSSGAKLIITOSQYVD       |
| Gra 4CL3    | 104 | GDVIMTLLPNSEPEFVFSFMASSMLGAVITANPFYTAELTKQLAASKAKLVVTLTSAHVH     |
|             |     |                                                                  |
| Pt 4CL2     | 157 | KLGDSDCHENNQKPGEDFIVITIDDP--PENCLHFNVLVEASESEMP--TVSILPDDPVA     |
| Popt r 4CL4 | 157 | KLGDSDCHENNQKPEEDFIVITIDDP--PENCLHFNVLVEANSESEMP--TVSILPDDPVA    |
| Mes 4CL1    | 152 | KLKDS--QENQPKLGGDFNVIITIDDP--PENCLHFTVLSEAKSEIP--DVTIHPDDPVA     |
| Bp4CL2      | 161 | KLRETG--ENFPKLGEDFTVITVDDP--PEKCLHFSVISEANEGEFSSTVSIHPDDPVA      |
| Ri 4CL3     | 181 | KLKQP-----GQHFQVVTIDDP--PENCLHFSVLSDANEINELP--QVSIHPDDPVA        |
| At 4CL3     | 160 | KLKLN-----GENLTLITIDDEPT--PENCLPFSTLITDDEITNPFQETVDIHGDDAAA      |
| Gra 4CL3    | 164 | KLKQDQ-----QGLKVVTVDEPAADENCMSEFR--EGESEVA--EVELISADAVA          |
|             |     |                                                                  |
| Pt 4CL2     | 213 | LPFSSGTTGLPKGVLTHKSLITSVAQQVDGEIPNLYLKQDDVLCVLPFHI FSLNSVL       |
| Popt r 4CL4 | 213 | LPFSSGTTGLPKGVLTHKSLITSVAQQVDGEIPNLYLKQDDVLCVLPFHI FSLNSVL       |
| Mes 4CL1    | 206 | LPFSSGTTGLPKGVLTHKSLITSVAQQVDGENPNLYLKQEDVLCVLPFHI YSLNSVL       |
| Bp4CL2      | 217 | LPFSSGTTGLPKGVVLTTHKSLITSVAQQVDGENPNLYLNPDVLCVLPFHI YSLNSVL      |
| Ri 4CL3     | 228 | LPFSSGTTGLPKGVLTHKSLITSVAQQVDGENPNLYLKQDDVLCVLPFHI FSLNSVL       |
| At 4CL3     | 210 | LPFSSGTTGLPKGVVLTTHKSLITSVAQQVDGDNPNLYLKSNDVLCVLPFHI YSLNSVL     |
| Gra 4CL3    | 209 | LPFSSGTTGLAKGVVLTTHKSLVTVGVAQNMEGENPNVYLKEEDVLCVLPFHI FSIHNSVM   |
|             |     |                                                                  |
| Pt 4CL2     | 273 | LCSLRAGSAVLLMQKFEIGSLELEIKQHNSVAAVPPPLVLAALAKNPLVAVDFLSSIRVV     |
| Popt r 4CL4 | 273 | LCSLRAGSAVLLMQKFEIGSLELEIKQHNSVAAVPPPLVLAALAKNPLVAVDFLSSIRVV     |
| Mes 4CL1    | 266 | LCSLRAGAAVLVMQKFEIGALLELEIKHNSVAAVPPPLVLAALAKNPLVAVDFLSSIRVV     |
| Bp4CL2      | 277 | LCSLRAGAAVLVMQKFEIGALLELEIKHRVNSVAAVPPPLVLAALAKNPLVAVDFLSSIRVV   |
| Ri 4CL3     | 288 | LCSLRAGAAVLVMQKFEIGTLELEIKRYRVFCGGWCLAGDSAGEESVADYDLSSIRVV       |
| At 4CL3     | 270 | LNSLRSGATVLLMHKFEIGALLDLIKRHRVTIAALVPPPLVLAALAKNPLVAVDFLSSIRVV   |
| Gra 4CL3    | 269 | MCALRAGSAIILLIEKFEIRALLELEIKRHRVTIAAVVPPPLVLAALAKNPLVAVDFLSSIRVV |
|             |     |                                                                  |
| Pt 4CL2     | 333 | LSGAAPLGKLEEDALRSRVPOAIGGGYGMT EAGPVLMSCLAFS KQPFPTKSGSCGT VVR   |
| Popt r 4CL4 | 333 | LSGAAPLGKLEEDALRSRVPOAIGGGYGMT EAGPVLMSCLAFS KQPFPTKSGSCGT VVR   |
| Mes 4CL1    | 326 | LSGAAPLGKLEEDALRSRVPOAIGGGYGMT EAGPVLMSCLGF AKQPFPTKSGSCGT VVR   |
| Bp4CL2      | 337 | LSGAAPLGKLEEDALRN RVPOAIGGGYGMT EAGPVLMSCLGF AKQPFPTKSGSCGT VVR  |
| Ri 4CL3     | 348 | LSGAAPLGKLEEDALRN RVPOAIGGGYGMT EAGPVLMSCLAF AKQPFPTKSGSCGT VVR  |
| At 4CL3     | 330 | LSGAAPLGKLEEDALRRRLPQALGGGYGMT EAGPVLMSLGF AKQPFPTKSGSCGT VVR    |
| Gra 4CL3    | 329 | MSGAAPLGKLEEDALRNRLPNAIGGGYGMT EAGPVLAMCLGF AKQPFPTKSGSCGT VVR   |
|             |     |                                                                  |
| Pt 4CL2     | 393 | NAELKVIDPETGRSLGYNQPGEICIRGSI MKGYLNDAEATANTIDVEGWLHTGDI GYVD    |
| Popt r 4CL4 | 393 | NAELKVIDPETGRSLGYNQPGEICIRGSI MKGYLNDAEATANTIDVEGWLHTGDI GYVD    |
| Mes 4CL1    | 386 | NAELKVIDPETGCSLGYNQPGEICIRGQI MKGYLNDLEATANTIDVEGWLHTGDI GYVD    |
| Bp4CL2      | 397 | NAELKVIDPETGCSLGYNQPGEICIRGSI MKGYLNDDAATATIDVEGWLHTGDI GYVD     |
| Ri 4CL3     | 408 | NAELKVIDPETGRSLGYNQPGEICVRGSI MKGYLNDGEATATIDVEGWLHTGDI GYVD     |
| At 4CL3     | 390 | NAELKVIDPETGRSLGYNQPGEICIRGQI MKGYLNDPEATATIDVEGWLHTGDI GYVD     |
| Gra 4CL3    | 389 | NAELKVIDPETGRSLGYNQPGEICIRGQI MKGYLNDKATATIDVEGWLHTGDI GYVD      |

**Figure S11. Alignment of predicted amino acid sequence of silver birch (*Betula pendula*) putative 4-coumarate:CoA ligase (Bp4CL2, KM099196).** Bp4CL2 aligned with the predicted amino acid sequences of *Arabidopsis thaliana* (At4CL3, At1g65060), *Rubus idaeus* (Ri4CL3, AAF91308), *Glycine max* (Gm4CL3, NM\_001250341), *Manihot esculenta* (Mes4CL1, cassava4.1\_004658m; Mes4CL4, cassava4.1\_004136m), *Populus tremuloides* (Pt4CL2, AF041050), and *Populus trichocarpa* (Popt r 4CL4, grail3.0099003002 LG IX).

Poptr ACS1 1 ----- MEKSGYGRDGI YRSLRPTLVLPKDPNLSLVSFLFRNSNSYPHKPALI DADLS-IT  
 Poptr ACS2 1 ----- MEKSGYGRDGI YRSLRPLVLKDPNLSLVSFLFRNSNSYPHKPALI DADLS-IT  
 Bp4CL3 1 ----- MEKSGYGRDGI YRSLRPLVLKDPNLSLVSFLFRNSNSYPHKPALI DADLS-IT  
 At ACS6 1 ----- MEKSGYGRDGI YRSLRPTLVLPKDPNLSLVSFLFRNSNSYPHKPALI DADLS-IT  
 Os ACS1 1 MASASVPAAGYGADGVYRSLRPPAPVASDPGLSLTDLRLRRADACPSAVALADAAAGGRA

Poptr ACS1 55 LSFSELSKSI VIKFAHGLLN-LGI SKNDVLI FAPNSYQFPI CFLAITSI GAVATTANPLY  
 Poptr ACS2 55 LSFSELSKSI VIKVAHGLLN-LGI SKNDVLI FAPNSYQFPI CFLAITSI GAVATTANPLY  
 Bp4CL3 55 LSFSELSKSI VIKVAHGLLN-LGI SKNDVLI FAPNSYQFPI CFLAITSI GAVATTANPLY  
 At ACS6 55 LSFSELSKSI VIKVAHGLLN-LGI SKNDVLI FAPNSYQFPI CFLAITSI GAVATTANPLY  
 Os ACS1 61 LTFSELSKSI VIKVAHGLLN-LGI SKNDVLI FAPNSYQFPI CFLAITSI GAVATTANPLY

Poptr ACS1 114 TTSSELSKQI KDSNPKLVI TVPELWDKVKGFNLPAVFLGP--KEVSLPLESGSRI RFSFHS  
 Poptr ACS2 114 TTSSELSKQI KDSNPKLVI TVPELWDKVKGFNLPAVFLGP--KRVSLPLESGSRI RFSFHS  
 Bp4CL3 114 TVHELARQYKDSNPKLVI TVPELWDKVKGFNLPAVFLGSG--NHSS---SSNVI HFDDL  
 At ACS6 114 TVNEVSKQI KDSNPKLVI TVPELWDKVKGFNLPAVFLGSG--DTVEI PPGSNSKILSFDNV  
 Os ACS1 121 TPREI AKQVSDARAKLVI TISALVPKI AGLRRLPVI LDDANAAAASLPDPATVTLYTNL

Poptr ACS1 172 MELGG-----SNSEFPVSDVKQSDI ATLLYSSGTTGVSKGVI LTHGNFI AASLMVMSMDQ  
 Poptr ACS2 172 VGLGG-----SNSQFPSSNVKQSDI STLLYSSGTTGVSKGVI LTHGNFI AASLMVMSMDQ  
 Bp4CL3 168 VNLGGTWSGSRSGSDFPDSNVKQNDT AALLYSSGTTGVSKGVI LTHGNFI AASLMVMSMDQ  
 At ACS6 173 MELSEP-----VSEYFPFVEI KQSDT AALLYSSGTTGVSKGVI LTHGNFI AASLMVMSMDQ  
 Os ACS1 181 VAGVK-----EADYRRPPI KQSDT AALLYSSGTTGVSKGVI LTHGNFI AASLMVMSMDQ

Poptr ACS1 226 VMAGEI HNVFLCFLPMFHVFGGL AVI TYSQLQMGNAVVS MGKFEFEMVLRITIEKYRVTHMW  
 Poptr ACS2 226 AMAGEMHNVFLCFLPMFHVFGGL AVI TYSQLQMGNAVVS MGKFEFEMVLRITIEKYRVTHMW  
 Bp4CL3 228 ELSGEAHNVFLCFLPMFHVFGGL AVI TYSQLQMGNAVVS MGKFEFEMVLRITIEKYRVTHMW  
 At ACS6 227 DLMGEYHGVFLCFLPMFHVFGGL AVI TYSQLQMGNAVVS MGKFEFEMVLRITIEKYRVTHMW  
 Os ACS1 234 DERREGPNVFLCFLPMFHVFGGL AVI TYSQLQMGNAVVS MGKFEFEMVLRITIEKYRVTHMW

Poptr ACS1 286 VVPPVILALAKQDMVKKYDLSLRLNIGS GAAPL GKDL MEECAKNLPDITII QGFGMTETC  
 Poptr ACS2 286 VVPPVILALAKQDMVKKYDLSLRLNIGS GAAPL GKDL MEECAKNLPDITII QGFGMTETC  
 Bp4CL3 288 VVPPVILALAKQDMVKKYDLSLRLNIGS GAAPL GKDL MEECAKNLPDITII QGFGMTETC  
 At ACS6 287 VVPPVILALAKQDMVKKYDLSLRLNIGS GAAPL GKDL MEECAKNLPDITII QGFGMTETC  
 Os ACS1 294 CVPPVILALAKHGKAGKYDLSLRLNIGS GAAPL GKDL MEECAKNLPDITII QGFGMTETC

Poptr ACS1 346 GIVSLEDPRIG-VRHSGSAGI LNAIGEAQI SVETAKPLPPNQLGEI WVRGPNMMRGYFN  
 Poptr ACS2 346 GIVSLEDPRIG-VRHSGSAGI LNAIGEAQI SVETAKPLPPNQLGEI WVRGPNMMRGYFN  
 Bp4CL3 348 GIVSLEDPRIG-VRHSGSAGI LNAIGEAQI SVETAKPLPPNQLGEI WVRGPNMMRGYFN  
 At ACS6 347 GIVSLEDPRIG-VRHSGSAGI LNAIGEAQI SVETAKPLPPNQLGEI WVRGPNMMRGYFN  
 Os ACS1 354 GIVSLEDPRIG-VRHSGSAGI LNAIGEAQI SVETAKPLPPNQLGEI WVRGPNMMRGYFN

Poptr ACS1 405 NPQATKDTIDKKGWHTGDLGYFDGQGFVVDRI KELI KYKGFQVAPAELEGLLVSHPE  
 Poptr ACS2 405 NPQATKDTIDKKGWHTGDLGYFDGQGFVVDRI KELI KYKGFQVAPAELEGLLVSHPE  
 Bp4CL3 407 NPQATKDTIDKKGWHTGDLGYFDGQGFVVDRI KELI KYKGFQVAPAELEGLLVSHPE  
 At ACS6 406 NPQATKDTIDKKGWHTGDLGYFDGQGFVVDRI KELI KYKGFQVAPAELEGLLVSHPE  
 Os ACS1 414 NPQATKDTIDKKGWHTGDLGYFDGQGFVVDRI KELI KYKGFQVAPAELEGLLVSHPE

Poptr ACS1 465 ILDAVVI PYPDAEAGEVPIAYVVRSPNSALTEEDVQKFI SDQVAPFKRLRRTVFI NSVPK  
 Poptr ACS2 465 ILDAVVI PYPDAEAGEVPIAYVVRSPNSALTEEDVQKFI SDQVAPFKRLRRTVFI NSVPK  
 Bp4CL3 467 ILDAVVI PYPDAEAGEVPIAYVVRSPNSALTEEDVQKFI SDQVAPFKRLRRTVFI NSVPK  
 At ACS6 466 ILDAVVI PYPDAEAGEVPIAYVVRSPNSALTEEDVQKFI SDQVAPFKRLRRTVFI NSVPK  
 Os ACS1 473 ILDAVVI PYPDAEAGEVPIAYVVRSPNSALTEEDVQKFI SDQVAPFKRLRRTVFI NSVPK

Poptr ACS1 525 SASGKILRREL VQVSKSKM-  
 Poptr ACS2 525 SASGKILRREL VQVSKSKM-  
 Bp4CL3 527 SASGKILRREL VQVSKSKM-  
 At ACS6 526 SASGKILRREL VQVSKSKM-  
 Os ACS1 533 SASGKILRREL VQVSKSKM-

**Figure S12.** Alignment of predicted amino acid sequence of silver birch (*Betula pendula*) putative 4CL-like acyl-CoA synthetase (ACS) (Bp4CL3, KM099197). Bp4CL3 aligned with the predicted amino acid sequences of *Arabidopsis thaliana* (AtACS6, At4g05160), *Oryza sativa* (OsACS1, Os03g05780) and *Populus trichocarpa* (PoptrACS1, eugene3.01230068; PoptrACS2, estEXT\_fgenesh1\_pg\_v1.C\_LG\_IV0024).

|           |     |                                                                  |
|-----------|-----|------------------------------------------------------------------|
| Bp4CL4    | 1   | ME-PQK----DLQEFIFRSKLPDIYI PNHLPLHTYCFENLSQFKDRPCLINGADGVTYTY    |
| Ri4CL2    | 1   | MENKHQ---DDHEFIFRSKLPDIYI PNHLPLHTYCFENLSQFKDRPCLINGNTGETFTY     |
| Poptr4CL1 | 1   | MEAEKD---QAQEFIFRSKLPDIHI PNHLPLHTYCFENLSRFKDRPCLINGPTGETFTY     |
| Poptr4CL2 | 1   | MEANKD---QVQEFIFRSKLPDIYI PNHLPLHTYCFEKLSQFKDYPCLINGPTGDIYTY     |
| Gm4CL7    | 1   | MEKQPTQPQHDFIFRSKLPDIYI PTHLPLHTYLFQNLQSFKDRPCLINAATGETFTY       |
| Gm4CL8    | 1   | MEEQQ---AHHDFIFRSKLPDIYI PSHLPLHTYLFQNLQSFKDRPCLINGTTGETFTSY     |
| Gm4CL1    | 1   | MAPSPQ-----ETIFRSPLPDIPIPTHLPLYSYCFQNLQSKFDRPCLIDGDTGETLTY       |
| Gm4CL9    | 1   | MELSPQ-----EFIFRSPLPDIPIPTHLPLYSYCFQKLSQFDRPCLIDGDTSETLTY        |
|           |     |                                                                  |
| Bp4CL4    | 56  | AQVELTARKVASGLDKLGIKQGEVIMLLLQNCPEFAFAFLGASYIGAVSITANPFYTPAE     |
| Ri4CL2    | 57  | AEVELTSRRVAAGLDKLGIQONDVVMLLLQNCPEFAFAFLGASYIGAMSTANPFYTPAE      |
| Poptr4CL1 | 57  | ADVELTSRKVASGLNKLGIKQGDVIMLLLQNSPEFVFAFLGASTIGASITANPFYTPAE      |
| Poptr4CL2 | 57  | ADVELTSRKVASGLYKLGVOGDVIMLLLQNSPEFVFAFLGASTIGASITANPFYTPAE       |
| Gm4CL7    | 61  | AAVELTARKVASGFNKLGIKQGDVIMLLLQNCPEFVFAFLGASYRGATVITANPFYTPAE     |
| Gm4CL8    | 56  | HAIQLTARRVASGLNKLGIKQGDVIMLLLQNCPEFVFAFLGASYRGATVITANPFYTPAE     |
| Gm4CL1    | 54  | ADVDLAARRIASGLHKIGIRQGDVIMLVLRNCPQFALAFLGATHRGAVVITANPFYTPAE     |
| Gm4CL9    | 54  | ADVDLAARRIASGLHKIGICQGDVIMLVLRNCPQFALAFLGATHRGAVVITANPFYTPAE     |
|           |     |                                                                  |
| Bp4CL4    | 116 | VAKQAKASNTKLIITQSSYVDKVKDFAKENG-VKVMCIDSDS----SLDDFLHFSQLTQADE   |
| Ri4CL2    | 117 | VAKQAKASNAKLIITQSAVYVDKVKDFAKLND-VKVMCVDVET----SSEDVLHFSSELVSADE |
| Poptr4CL1 | 117 | VAKQATASKAKLIITQAVYAEKVQQFVKEVDHVKIIVTVDS----PPENYLHFSSELVTSDE   |
| Poptr4CL2 | 117 | VAKQATASKAKLIITQAVYAEKVQQFAQENDHVKIMTIIDSDS----LTENCLHFSSELVTSDE |
| Gm4CL7    | 121 | VAKQATASNSKLIITQASVYVDKVKDFAREND-VKVICVDS----APDGYLHFSVLTQADE    |
| Gm4CL8    | 116 | VAKQATASNSKLIITQASVYVDKVKDFAREND-VKVICVDS----APEGYLHFSSELVTEADE  |
| Gm4CL1    | 114 | LAKQATATKTRLVITQSAVYVEKIKSFADSSDVMVMCIDDDFSYENDGVLHFSVLTQNADE    |
| Gm4CL9    | 114 | LAKQAMATKTRLVITQSAVYLEKIKSFADDS-DVMVMCIDDDYSSENDGVLHFSVLTQNADE   |
|           |     |                                                                  |
| Bp4CL4    | 171 | NDIPAVKINPDDVVALPYSSGTTGLPKGVMLTHKGLVTSVAQQVDGENPNLYFHS GDVIL    |
| Ri4CL2    | 173 | SETPAVKINPDDVVALPYSSGTTGLPKGVMLTHKGLVTSVAQQVDGENPNLYFHKE DVI L   |
| Poptr4CL1 | 173 | DDIPAVKINPDDVVALPYSSGTTGLPKGVMLTHKGLVTSVAQQVDGENPNLYFHE KDVI L   |
| Poptr4CL2 | 173 | NEIPAVKINPDDVVALPYSSGTTGLPKGVMLTHKGLVTSVAQQVDGENPNLYFHERDVI L    |
| Gm4CL7    | 176 | GDIIPAVKISQDDVVALPYSSGTTGLPKGVMLTHKGLVTSVAQQVDGENPNLYFRS DDVVV   |
| Gm4CL8    | 171 | GDIIPAVKISQDDVVALPYSSGTTGLPKGVMLTHKGLVTSVAQQVDGENPNLYFRS DDVLL   |
| Gm4CL1    | 174 | TEAPAVKINPDELVALPFSSTGSLPKGVMLSHKNLVTTIAQLVDGENPHQYTHSE DVL L    |
| Gm4CL9    | 173 | REAPAVKINPDDLVALPFSSTGSLPKGVMLSHENLVTTISQLVDGENPHQYTHSE DVL L    |
|           |     |                                                                  |
| Bp4CL4    | 231 | CVLPLFHIYSLNSVFLCGLRVGASILIMQKFEIVKLELQVQYKVTIAPFVPPIVLAI AK     |
| Ri4CL2    | 233 | CVLPLFHIYSLNSVFLCGLRVGAAILIMQKFEINLLELVEKEKVTIAPFVPPIVLSI AK     |
| Poptr4CL1 | 233 | CVLPLFHIYSLNSVLLCGLRVGSAIILIMQKFEIVTLMELVQYKVTIAPFVPPIVLVA AK    |
| Poptr4CL2 | 233 | CVLPLFHIYSLNSVLLCGLRVGSAIILIMQKFEIVSLMDLVQYKVTIAPLVPPIVLAI AK    |
| Gm4CL7    | 236 | CVLPLFHIYSLNSVLLCGLRVGAAVLIVPKFEEVALLLELVQKHNVSVAPFVPPIVLAI AK   |
| Gm4CL8    | 231 | CLLPLFHIYALNSVLLCGLRVGASVLIIVPKFEEITLLELIVQKHVSTAPFVPPIVLVA AK   |
| Gm4CL1    | 234 | CVLPMFHIYALNSILLCGIRSGAAVLIIVQKFEITLLELIVQKVTIVASFVPPIVLALVK     |
| Gm4CL9    | 233 | CVLPMFHIYALNSILLCGIRSGAAVLIIVQKFEITLLELIVQKVTIVASFVPPIVLALVK     |
|           |     |                                                                  |
| Bp4CL4    | 291 | SPDVQWYDVSSI RTVMSGAAPMGKELEDAVRAKLPNAKLGQGYGNTAEGPVLAMCLAF AK   |
| Ri4CL2    | 293 | CPDLHRYDLSSI RMVMSGAAPMGKELEDTVRAKLPNAKLGQGYGNTAEGPVLAMCLAF AK   |
| Poptr4CL1 | 293 | CPVVDKYDLSSI RTVMSGAAPMGKELEDTVRAKLPNAKLGQGYGNTAEGPVLAMCLAF AK   |
| Poptr4CL2 | 293 | SPVVDQYDLSSI RTVMSGAAPMGKELEDTVRAKLPNAKLGQGYGNTAEGPVLAMCLAF AK   |
| Gm4CL7    | 296 | SPDVERYDVSSI RMTMSGAAPMGKELEDSVRAKLPNATLGQGYGNTAEGPVLAMCLAF AK   |
| Gm4CL8    | 291 | SPDLERYDLSSI RMTMSGAAPMGKELEDSVRAKLPNAI LGQGYGNTAEGPVLAMCLAF AK  |
| Gm4CL1    | 294 | SGETHRYDLSSI RAVVTGAAPLGGELQEAVKARLPHATFGQGYGNTAEGPVLAMCLAF AK   |
| Gm4CL9    | 293 | SGETHRYDLSSI RAVVTGAAPLGGELQEAVKARLPHATFGQGYGNTAEGPVLAMCLAF AK   |
|           |     |                                                                  |
| Bp4CL4    | 351 | EAFETIKSGACGTVVRNAQVKIVDPDTGASLPRNQAGEICIRGSIKMGYLNDEPEATERTI    |
| Ri4CL2    | 353 | EPYETIKSGACGTVVRNAENKIVDPDTNESLPRNOSGEICIRGSIKMGYLNDEPEATERTI    |
| Poptr4CL1 | 353 | EPFETIKSGACGTVVRNAENKIVDPDTGRSLPRNQAGEICIRGSIKMGYLNDEPEATERTI    |
| Poptr4CL2 | 353 | EPFETIKSGACGTVVRNAENKIVDPDETGDSQPRNKAGEICIRGSIKMGYLNDEPEATERTI   |
| Gm4CL7    | 356 | EPVQVKSACGTVVRNAENKIVDPDTGASLPRNQAGEICIRGNQIKMGYLNDEPEATERTI     |
| Gm4CL8    | 351 | EPVQVKSACGTVVRNAENKIVDPRTGASLPRNQAGEICIRGNQIKMGYLNDEPEATERTI     |
| Gm4CL1    | 353 | VPSKIKPACGTVVRNAENKIVDETETGDSLPRNKHGEICIRGTVKMGYLNDEPEATERTI     |
| Gm4CL9    | 352 | EPSKIKPACGTVVRNAENKIVDETETGDSLPRNKSGEICIRGAKVMGYLNDEPEATERTI     |

**Figure S13. Alignment of predicted amino acid sequence of silver birch (*Betula pendula*) putative 4-coumarate:CoA ligase (Bp4CL4, KM099198). Bp4CL4 with the predicted amino acid sequences of *Rubus idaeus* (Ri4CL2, AAF91309), *Glycine max* (Gm4CL7, Glyma17g07170; Gm4CL8, Glyma17g07180; Gm4CL1, Glyma17g07190; Gm4CL9, Glyma13g01080), and *Populus trichocarpa* (Poptr4CL1, estExt\_fgenesh4\_pg.C\_1210004 scaffold3; Poptr4CL2, gw1.XVIII.2818.1 LG\_XVIII).**

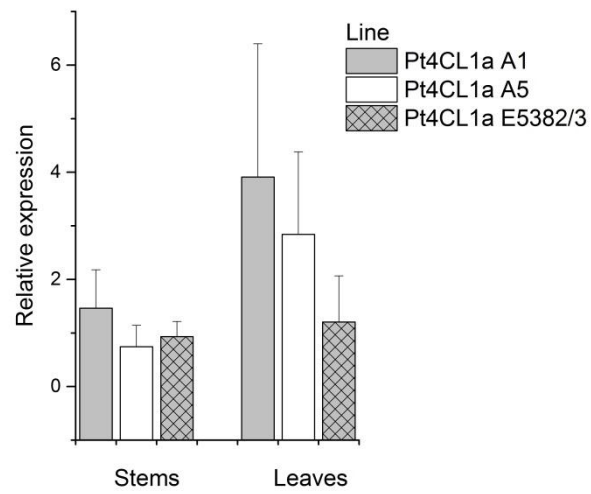

**Figure S14. Relative expression of *Pt4CL1* in stems and leaves of *Pt4CL1a* lines A1, A5 and E5282/3.** Values represent means and standard deviations calculated using *PP2A* gene as reference gene (n = 3–14).

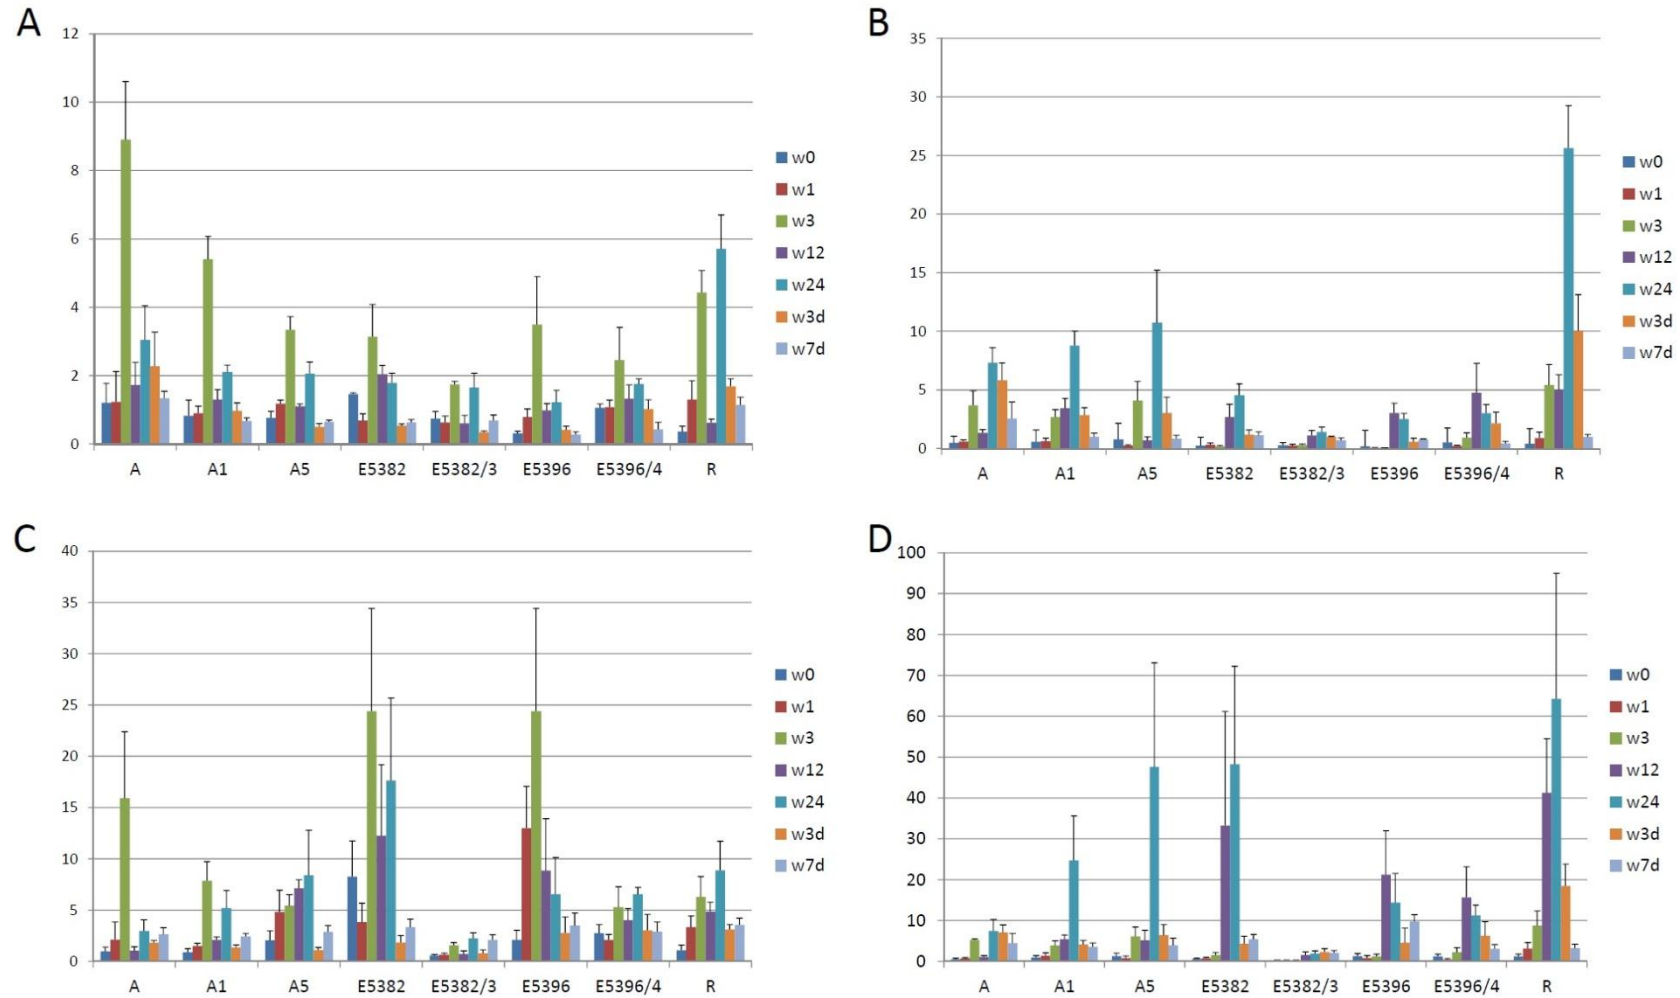

**Figure S15. Relative expression of *Bp4CL1-4* genes in mechanically wounded silver birch (*Betula pendula*) leaves.** The *Bp4CL1* (A, C) and *Bp4CL2* (B, D) expression in leaves collected immediately (w0) and 1 (w1), 3 (w3), 12 (w12), 24 (w24), 72 (w3d), and 162 (w7d) h after mechanical wounding of clones A, E5382, E5396 and R and transgenic lines A1, A5, E5382/3 and E5396/4. Values represent means and standard errors calculated from the target/reference ratios. A and C, *PP2A* was used as the reference gene; B and D, *Atub* was used as the reference gene.

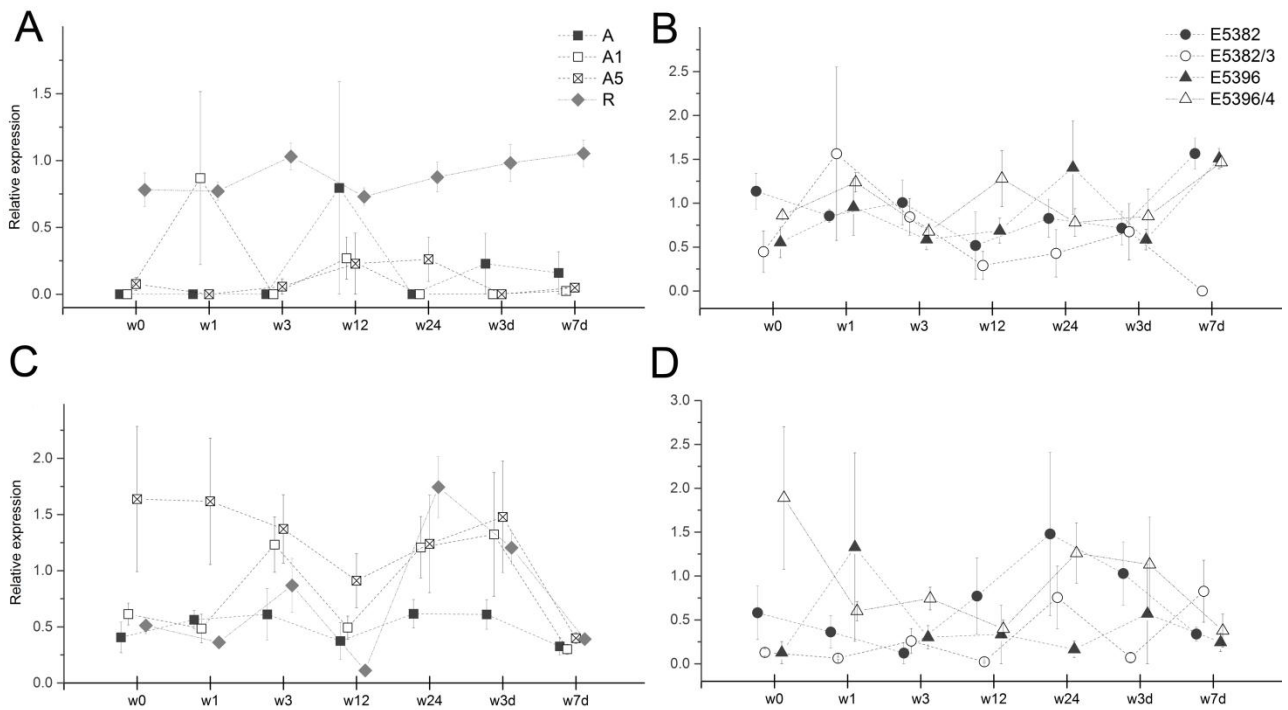

**Figure S16. Relative expression of *Bp4CL3* (A, B), and *Bp4CL4* (C, D) in wounded leaves.** The leaves were collected immediately (w0) and 1, 3, 12, 24, 48, and 162 h after mechanical wounding of silver birch (*Betula pendula*) clones A and R and transgenic lines A1 and A5 (A, C) and clones E5382 and E5396 and transgenic lines E5382/3 and E5396/4 (B, D). Values represent means and standard errors calculated using the mean of control leaves as normalizer within each line/clone and *PP2A* as reference.
