# Supplementary material for: Phenolic Compounds and Expression of 4CL Genes in Silver Birch Clones and Pt4CL1a Lines
Source: PubMed Central journal article supplement (PMC4263613; doi:10.1371/journal.pone.0114434), 2014-12-11
Supplement: pone.0114434.s002.pdf [file pone.0114434.s002.pdf]

**Table S1. The primers used in the production the probes, subcloning of cds of putative *Bp4CL1-4* and real-time RT-PCR.**

| Gene                                                                   | Forward primer (5'→3')   | Reverse primer (5'→3')     | Product size (bp) | Efficiency stems# | Linear dynamic range (stems)* | Efficiency leaves# | Linear dynamic range (leaves)* |
|------------------------------------------------------------------------|--------------------------|----------------------------|-------------------|-------------------|-------------------------------|--------------------|--------------------------------|
| Primers used in the generation of Northern and Southern probes         |                          |                            |                   |                   |                               |                    |                                |
| <i>Pt4CL1</i> 1)                                                       | GGGTTTCAGGTTGCTCCTAC     | AGTCTCAGAAGACCACAGGG       | 892               |                   |                               |                    |                                |
| 2)                                                                     | TTTGCTCTCGAGGCCTTGCA     | ATCGCAAGACCGGCAACAGG       | 509               |                   |                               |                    |                                |
| 3)                                                                     | AACCAGTGTGGCTCAACAGG     | TTGCCTGATGGTGCCTTGGG       | 956               |                   |                               |                    |                                |
| <i>nptII</i>                                                           | TGGGCACAACAGACAATCGG     | CAGCAATATCACGGGTAGCC       | 800               |                   |                               |                    |                                |
| Primers used in the subcloning of the full cds of putative <i>4CLs</i> |                          |                            |                   |                   |                               |                    |                                |
| <i>Bp4CL1</i>                                                          | CCCCCATCTCTTTGTGCTTA     | ATAAAAGGTGTCGTGGGGAAT      | 1803              |                   |                               |                    |                                |
| <i>Bp4CL2</i>                                                          | CCACACACAATACCCCTAGAAAC  | GAACATTGGTTGAGATGGATGA     | 1912              |                   |                               |                    |                                |
| <i>Bp4CL3</i>                                                          | AATGGAAAAATCAGGGTACGG    | AAACATTCAATTTTCACATTTTGGGA | 1652              |                   |                               |                    |                                |
| <i>Bp4CL4</i>                                                          | CAGCAGCCAAACAAACATCA     | GGTGATTCCACAAAGCAACA       | 1797              |                   |                               |                    |                                |
| Primers used in the real-time RT-PCR                                   |                          |                            |                   |                   |                               |                    |                                |
| <i>Bp4CL1</i>                                                          | AAGGAGTTGAGGGCAAAA       | AAGGTGTCGTGGGGAAT          | 180               | 1.8               | 22.2–28.5                     | 2.0                | 23.9–29.9                      |
| <i>Bp4CL2</i>                                                          | CCACACACAATACCCCTAGAAAC  | GCTCAAAGCAGTAGGTGTGAAGT    | 240               | 1.8               | 30.2–34.1                     | 1.9                | 27.1–33.1                      |
| <i>Bp4CL3</i>                                                          | ACGTGGTGAAAAAGTACGATCTCT | CTAAGCCGAACACCTACTCTTGG    | 188               | 2.0               | 29–35.6                       | 1.9                | 27.7–34.9                      |
| <i>Bp4CL4</i>                                                          | TCCTACGTTGACAAAGTGAAAGAC | CGTCATCCGGGTTGATTTTA       | 152               | 1.8               | 28.2–34.7                     | 1.8                | 32.2–40                        |
| <i>Pt4CL1</i>                                                          | TCCCCTGCATTCATACGTTC     | CCTAGGAAAGCAAGCACGAA       | 213               | 1.9               | 26.3–32.9                     | 1.9                | 24.9–31                        |

1) Primers used in the generation of probe for *Bam*HI digested genomic DNA (Southern blot), forward primer specific for *Pt4CL1*, reverse primer specific for 35S promoter

2) Primers used in the generation of probe for *Xba*I digested genomic DNA (Southern blot), forward primer specific for *Pt4CL1*, reverse primer specific for NOS terminator

3) Primers used in the generation of probe for Northern blot analysis

#The efficiency of primer pair specific calibration curves calculated using the Abs Quant/2nd Derivative Max for All Samples in Lightcycler® 480 Software release 1.5.0 SP3

\*The linear dynamic range represents the range of the Cq values between the highest and the lowest concentration of the primer pair specific calibration curve

**Table S2. The performance of *Atub* and *PP2A* primers used in the amplification of reference genes.**

| Gene        | Study              | Product size (bp) | Material | Growing conditions | Cq <sup>^</sup> mean | Cq <sup>^</sup> SD | CV% <sup>§</sup> mean | Efficiency <sup>#</sup> | Linear dynamic range* |
|-------------|--------------------|-------------------|----------|--------------------|----------------------|--------------------|-----------------------|-------------------------|-----------------------|
| <i>Atub</i> | Present study      | 174               | stems    | greenhouse         | 24.2                 | 1.0                | 0.23                  | 1.8                     | 21.7–27.7             |
|             | Present study      |                   | leaves   | greenhouse         | 31.1                 | 1.59               | 0.54                  | 1.8                     | 26.9–33.7             |
|             | Unpublished data   |                   | leaves   | growth chamber     | 30.1                 | 2.0                | 0.53                  | 2.0                     | 27.8–34.1             |
|             | Unpublished data   |                   | leaves   | field              | 28.7                 | 0.93               | 0.31                  | 2.0                     | 27.3–32.5             |
|             | Sutela et al. 2009 |                   | roots    | greenhouse         | 30.3                 | 2.4                | 1.22                  | 2.0                     | 23.1–29.5             |
| <i>PP2A</i> | Present study      | 213               | stems    | greenhouse         | 29.3                 | 1.68               | 0.55                  | 1.9                     | 26.3–32.9             |
|             | Present study      |                   | leaves   | greenhouse         | 32.7                 | 1.46               | 0.76                  | 1.9                     | 24.9–31               |
|             | Unpublished data   |                   | leaves   | growth chamber     | 34.8                 | 1.7                | 1.55                  | 2.0                     | 32.9–37.3             |
|             | Unpublished data   |                   | leaves   | field              | 33.0                 | 1.4                | 0.72                  | 2.0                     | 30.9–34.9             |
|             | Sutela et al. 2009 |                   | roots    | greenhouse         | 33.5                 | 1.57               | 2.16                  | 2.0                     | 26.4–35               |

<sup>^</sup>The Cq values represent the crossing points generated with Abs Quant/2nd Derivative Max for All Samples in Lightcycler® 480 Software release 1.5.0 SP3 across the whole dataset of untreated (control) samples

<sup>§</sup>The mean of CV% values of technical replicates across the dataset of untreated (control) samples

<sup>#</sup>The efficiency of primer pair specific calibration curves calculated using the Abs Quant/2nd Derivative Max for All Samples in Lightcycler® 480 Software release 1.5.0 SP3

<sup>\*</sup>The linear dynamic range represents the range of the Cq values between the highest and the lowest concentration of the primer pair specific calibration curve
