# Supplementary material for: Phenolic Compounds and Expression of 4CL Genes in Silver Birch Clones and Pt4CL1a Lines
Source: PubMed Central journal article supplement (PMC4263613; doi:10.1371/journal.pone.0114434), 2014-12-11
Supplement: pone.0114434.s004.pdf [file pone.0114434.s004.pdf]

**Table S6. The growth characteristics of silver birch non-transgenic clones and transgenic lines.**

| Clone / Line              | 1 <sup>st</sup> growing season | 2 <sup>nd</sup> growing season | 3 <sup>rd</sup> growing season |
|---------------------------|--------------------------------|--------------------------------|--------------------------------|
| <b>Stem height (m)</b>    |                                |                                |                                |
| A                         | 0.94 ± 0.1 (51)                | 1.86 ± 0.13 (44)               | 2.41 ± 0.12 (9)                |
| A1                        | 0.77 ± 0.09 (51) ***           | 1.7 ± 0.09 (41) ***            | 2.1 ± 0.05 (9) **              |
| A2                        | 0.58 ± 0.08 (51) ***           | 1.49 ± 0.13 (40) ***           | 1.93 ± 0.09 (9) **             |
| A5                        | 0.88 ± 0.09 (51) ***           | 1.85 ± 0.15 (44)               | 2.4 ± 0.01 (9)                 |
| E5382                     | 0.84 ± 0.12 (51)               | 1.74 ± 0.1 (44)                | 2.08 ± 0.11 (9)                |
| E5382/3                   | 0.91 ± 0.11 (43) **            | 1.82 ± 0.11 (35)***            | 2.16 ± 0.06 (9)                |
| <b>Stem diameter (mm)</b> |                                |                                |                                |
| A                         | NA                             | 11.17 ± 0.92 (44)              | 12.77 ± 0.96 (9)               |
| A1                        | NA                             | 10.05 ± 0.76 (41) ***          | 13.17 ± 0.92 (9)               |
| A2                        | NA                             | 9.16 ± 1.23 (40) ***           | 12.8 ± 1.06 (9)                |
| A5                        | NA                             | 11.0 ± 0.89 (44)               | 13.73 ± 1.22 (9)               |
| E5382                     | NA                             | 9.36 ± 0.86 (44)               | 11.73 ± 0.67 (9)               |
| E5382/3                   | NA                             | 9.62 ± 0.86 (35)               | 11.86 ± 0.5 (9)                |
| <b>Stem height (m)</b>    |                                |                                |                                |
| E5396                     | 0.14 ± 0.04 (60)               | 1.2 ± 0.27 (60)                | NA                             |
| E5396/4                   | 0.04 ± 0.01 (60) ***           | 0.2 ± 0.11 (60) ***            | NA                             |
| <b>Stem diameter (mm)</b> |                                |                                |                                |
| E5396                     | 3.73 ± 0.46 (60)               | 7.5 ± 0.87 (60)                | NA                             |
| E5396/4                   | 2.58 ± 0.33 (60) ***           | 3.54 ± 0.56 (60) ***           | NA                             |

Clone A and E5382 and lines A1, A2, A5 and E5382/3 were taken to greenhouse in June and were in the same experimental set-up for two years, which after the number of individual silver birches per clone/line was reduced to 9. The experimental set-up for clone E5396 and transgenic line E5396/4 was started one year later in August. The growth parameters were recorded in the end of each growing season. Pairwise comparison of non-transgenic clone and transgenic line according to the independent-samples t-test, or Wilcoxon test. The number of biological replicates in parentheses. \* =  $P < 0.05$ , \*\* =  $P < 0.01$ , \*\*\* =  $P < 0.001$ , NA = value not recorded

**Table S7. The phenology of autumn leaf senescence at the end of first growing season.**

| Clone   |       | 26 Sept. | 2 Oct. | 9 Oct. |
|---------|-------|----------|--------|--------|
| / Line  | Class | %        | %      | %      |
| A       | A     | 2        |        |        |
|         | B     | 55       |        |        |
|         | C     | 39       | 16     |        |
|         | D     | 4        | 84     | 100    |
| A1      | A     | 12       |        |        |
|         | B     | 84       | 10     |        |
|         | C     | 3        | 61     |        |
|         | D     |          | 29     | 100    |
| A2      | A     | 73       | 6      |        |
|         | B     | 27       | 82     | 2      |
|         | C     |          | 10     | 39     |
|         | D     |          | 2      | 59     |
| A5      | A     |          |        |        |
|         | B     | 82       | 10     |        |
|         | C     | 18       | 37     | 2      |
|         | D     |          | 53     | 98     |
| E5382   | A     |          |        |        |
|         | B     | 39       |        |        |
|         | C     | 51       | 14     |        |
|         | D     | 10       | 86     | 100    |
| E5382/3 | A     | 2        |        |        |
|         | B     | 28       |        |        |
|         | C     | 58       | 2      |        |
|         | D     | 12       | 98     | 100    |

The yellowing of leaves was categorised to four classes at three dates (the 26<sup>th</sup> September, the 2<sup>nd</sup> of October, and the 9<sup>th</sup> of October). The classes were A) leaves are green; B) some yellowing leaves; C) less than 50% of leaves are yellowing; D) more than 50% of leaves are yellowing. Values represent percentages of plants falling to each class at separate dates within each clone/line.

**Table S8. Relative growth rates (mg/d) of lepidopteran larvae.** The leaves of silver birch (*Betula pendula*) clones (A and E5382) and lines (A1, A2, A5 and E5382/3) were offered to the larvae of *Aethalura punctulata*, *Cleora cinctaria*, *Epirrita autumnata*, and *Orthosia gothica*.

| Species              |    | Clone            |                  | Lines            |                  | Clone            | Line             |
|----------------------|----|------------------|------------------|------------------|------------------|------------------|------------------|
|                      |    | A                | A1               | A2               | A5               | E5382            | E5382/3          |
| <i>A. punctulata</i> | I  | 0.26 ± 0.12 (13) | 0.36 ± 0.1 (14)  | 0.29 ± 0.12 (15) | 0.29 ± 0.07 (14) | 0.32 ± 0.12 (15) | 0.27 ± 0.10 (14) |
|                      | II | 0.35 ± 0.2 (14)  | 0.29 ± 0.12 (12) | 0.32 ± 0.11 (14) | 0.30 ± 0.08 (14) | 0.29 ± 0.1 (14)  | 0.29 ± 0.1 (15)  |
| <i>C. cinctaria</i>  | I  | 0.42 ± 0.09 (15) | 0.39 ± 0.17 (12) | 0.40 ± 0.17 (14) | 0.40 ± 0.12 (10) | 0.46 ± 0.1 (15)  | 0.49 ± 0.14 (13) |
|                      | II | 0.37 ± 0.13 (14) | 0.43 ± 0.18 (11) | 0.44 ± 0.15 (13) | 0.38 ± 0.19 (12) | 0.35 ± 0.18 (12) | 0.35 ± 0.16 (16) |
| <i>E. autumnata</i>  | I  | 0.25 ± 0.06 (15) | 0.28 ± 0.1 (11)  | 0.27 ± 0.11 (12) | 0.22 ± 0.11 (10) | 0.21 ± 0.1 (12)  | 0.16 ± 0.12 (10) |
|                      | II | 0.23 ± 0.16 (13) | 0.26 ± 0.06 (10) | 0.28 ± 0.12 (10) | 0.30 ± 0.13 (11) | 0.28 ± 0.13 (13) | 0.18 ± 0.12 (15) |
| <i>O. gothica</i>    |    | 0.40 ± 0.27 (10) | 0.46 ± 0.28 (13) | 0.51 ± 0.28 (8)  | 0.50 ± 0.27 (12) | 0.44 ± 0.3 (12)  | 0.50 ± 0.27 (9)  |

Values represent RGR mean (±SD, number of biological replicates in parentheses).
